# Supplementary material for: Metal-Biosurfactant Complexes Characterization: Binding, Self-Assembly and Interaction with Bovine Serum Albumin
Source: PubMed Central journal article supplement (PMC6627489; doi:10.3390/ijms20122864), 2019-06-12
Supplement: ijms-20-02864-s001.pdf [file ijms-20-02864-s001.pdf]

# Supplementary Information

## Metal-biosurfactant complexes characterization: binding, self-assembly and interaction with bovine serum albumin

Tomasz Janek <sup>1,\*</sup>, Lígia R. Rodrigues <sup>2</sup>, Eduardo J. Gudiña <sup>2</sup> and Żaneta Czyżnikowska <sup>3</sup>

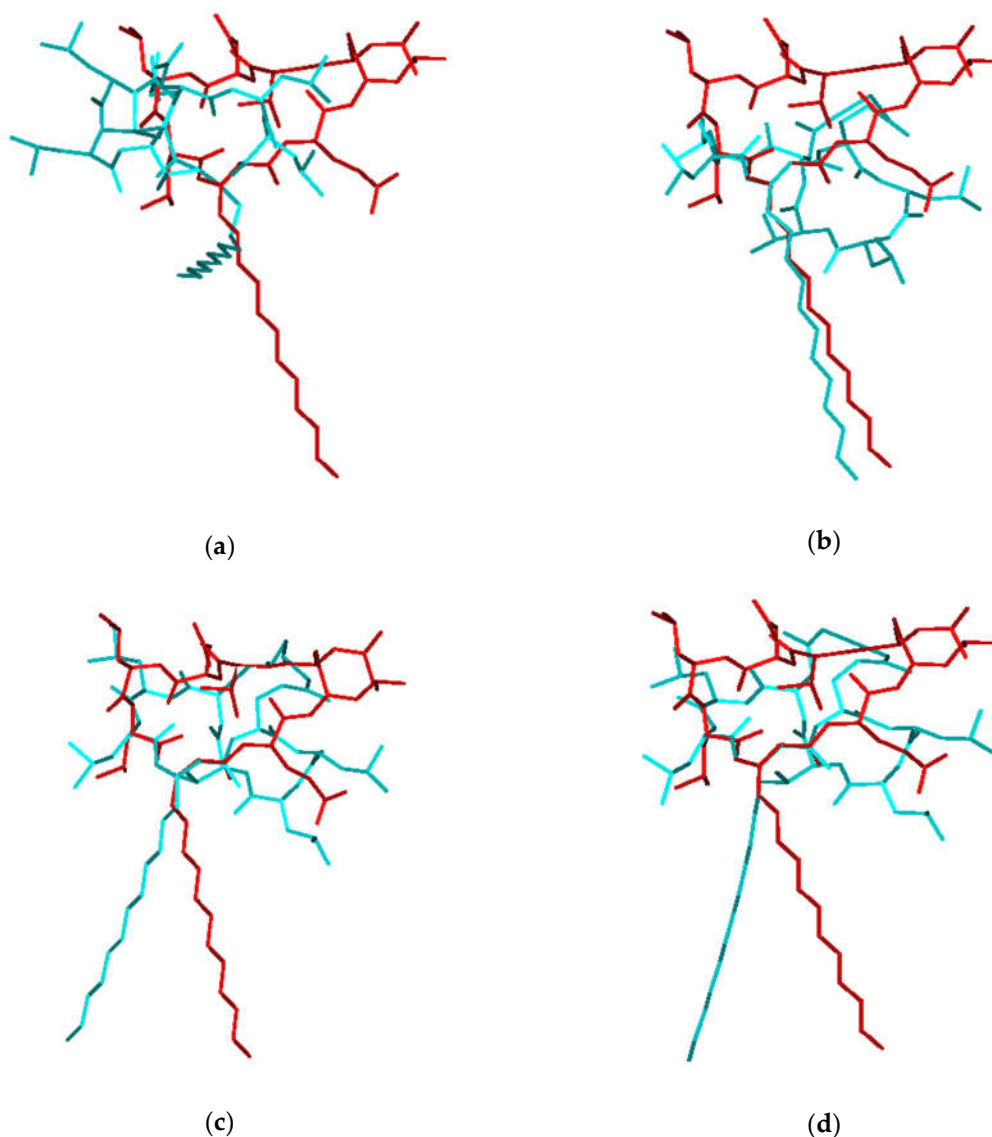

**Figure S1.** Comparison of the calculated structures of the surfactin (red) and Cu<sup>2+</sup>-surfactin (a), Zn<sup>2+</sup>-surfactin (b), Mg<sup>2+</sup>-surfactin (c), Ca<sup>2+</sup>-surfactin (d) complexes (blue).

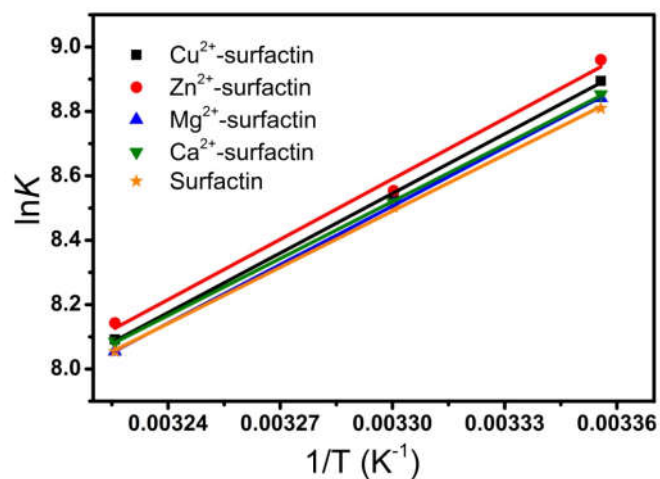

**Figure S2.** Van't Hoff plot for the interaction of BSA and surfactin or metal-surfactin complexes at different temperatures (298, 303 and 310 K).

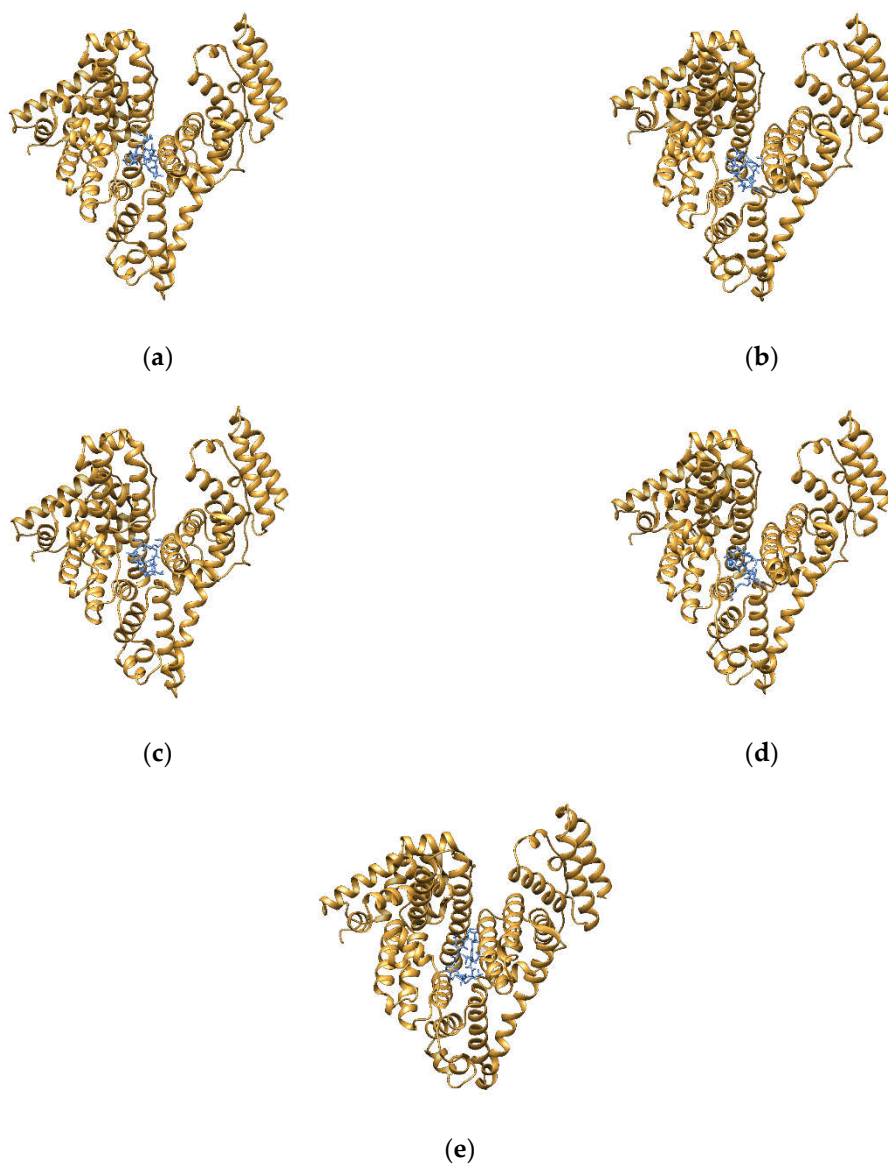

**Figure S3.** Bovine serum albumin (BSA) in complex with Cu<sup>2+</sup>-surfactin/BSA (a), Zn<sup>2+</sup>-surfactin/BSA (b), Mg<sup>2+</sup>-surfactin/BSA (c), Ca<sup>2+</sup>-surfactin/BSA (d), and surfactin/BSA (e). BSA was represented by a ribbon structure and investigated complexes were represented by stick model.

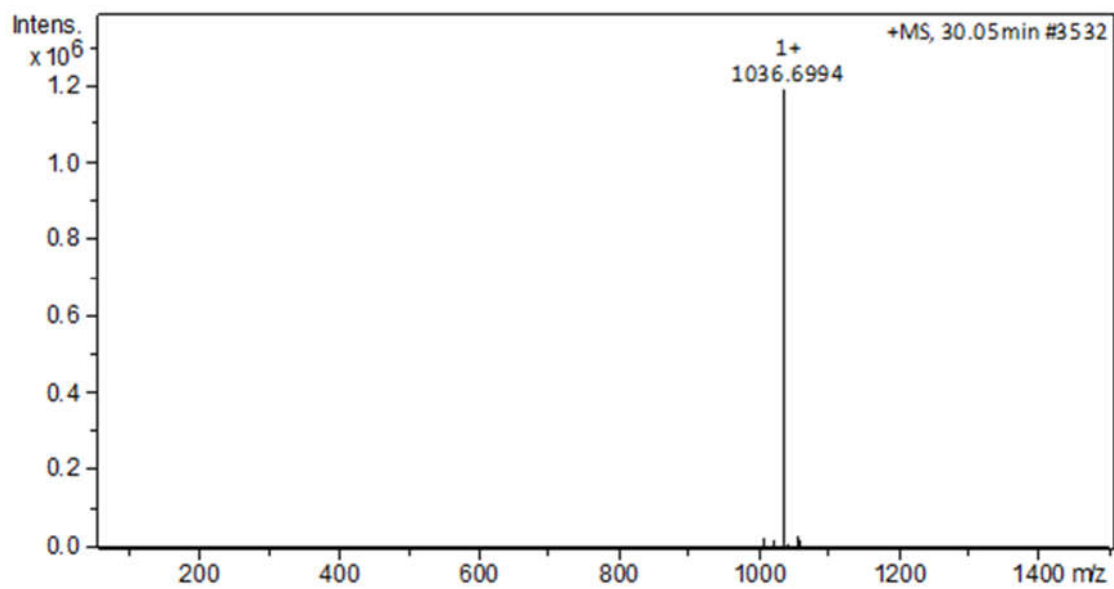

**Figure S4.** Positive electrospray ionization mass spectrometry (ESI-MS) spectroscopy of surfactin-C<sub>15</sub>.
